# Supplementary material for: In situ growth of δ-MnO 2 /C fibers as a binder-free and free-standing cathode for advanced aqueous Zn-ion batteries
Source: Royal Society of Chemistry journal article supplement (doi:10.1039/d4qi01661k), 2024-01-01
Supplement: d4qi01661k1.pdf [file d4qi01661k1.pdf]

## Supporting Information

### In situ growth of $\delta$ -MnO<sub>2</sub>/C fibers as binder-free and free-standing cathode for advanced aqueous Zn-ions batteries

Yan Li<sup>a</sup>, Fei Zhang<sup>a</sup>, Miaomiao Wu<sup>a</sup>, Yong Guo<sup>a\*</sup>, Yuanyuan Liang<sup>a</sup>, Reyihanguli Ababaikeri<sup>a</sup>, Luyang Wang<sup>a</sup>, Qiao Liu<sup>a</sup>, Xingchao Wang<sup>ab\*</sup>

<sup>a</sup>State Key Laboratory of Chemistry and Utilization of Carbon Based Energy Resources; Key Laboratory of Advanced Functional Materials, Autonomous Region; Institute of Applied Chemistry, College of Chemistry, Xinjiang University, Urumqi, 830046, Xinjiang, P. R. China.

<sup>b</sup>Key Laboratory of Advanced Energy Materials Chemistry (Ministry of Education), Nankai University, Tianjin 300071, China

E-mail: [xju1998@163.com](mailto:xju1998@163.com); [ichemabc@126.com](mailto:ichemabc@126.com)

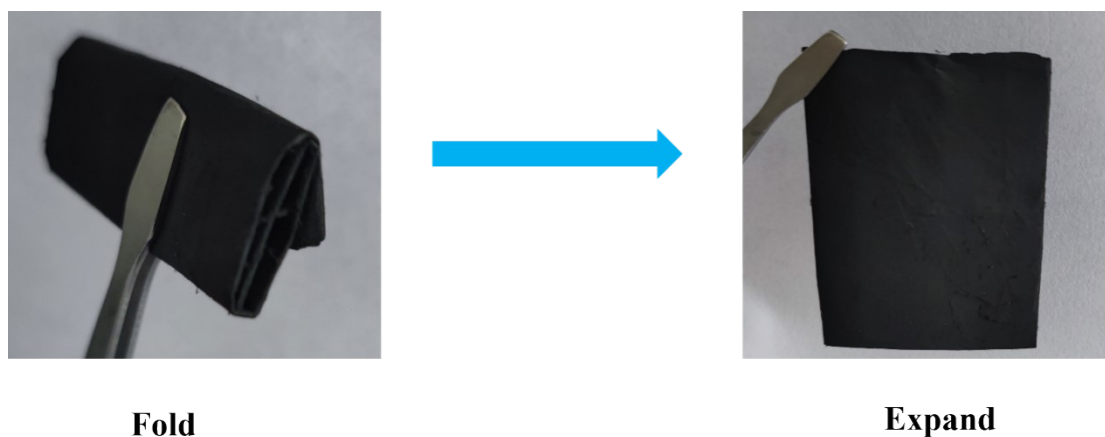

Figure S1. Flexibility of  $\delta$ -MnO<sub>2</sub>@CCFs.

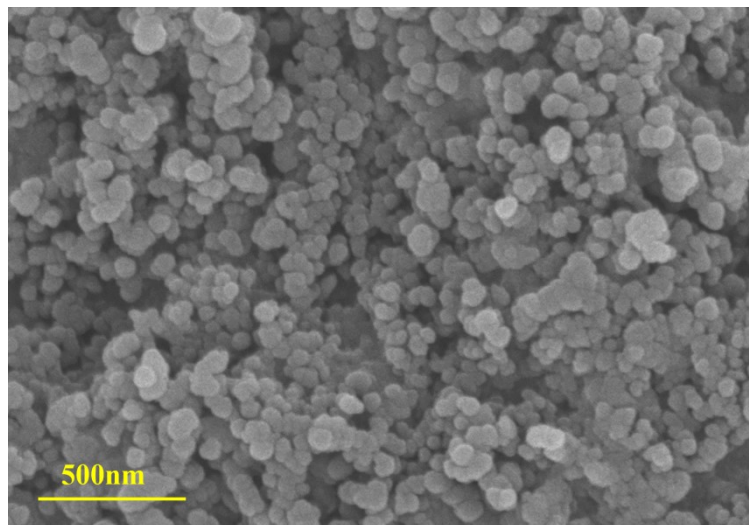

Figure S2. SEM of  $\delta$ -MnO<sub>2</sub>.

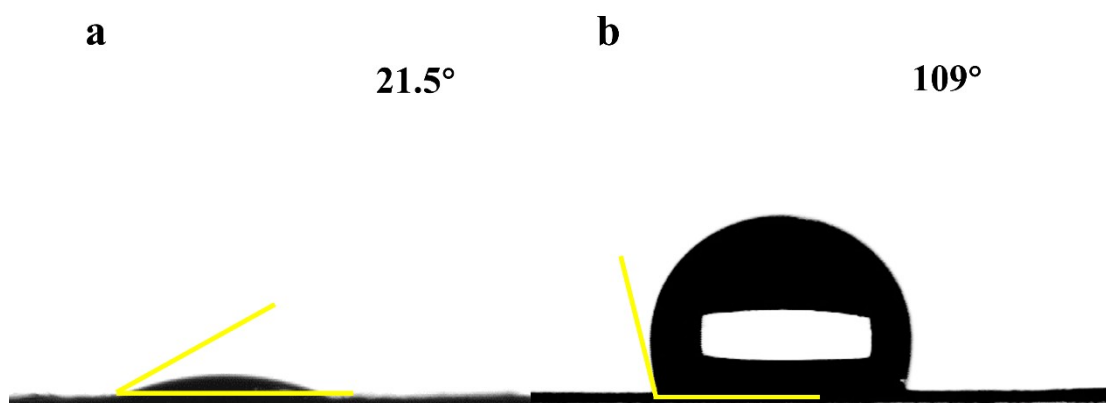

Figure S3 Contact angle of a)  $\delta$ -MnO<sub>2</sub>@CCFs and b)  $\delta$ -MnO<sub>2</sub>.

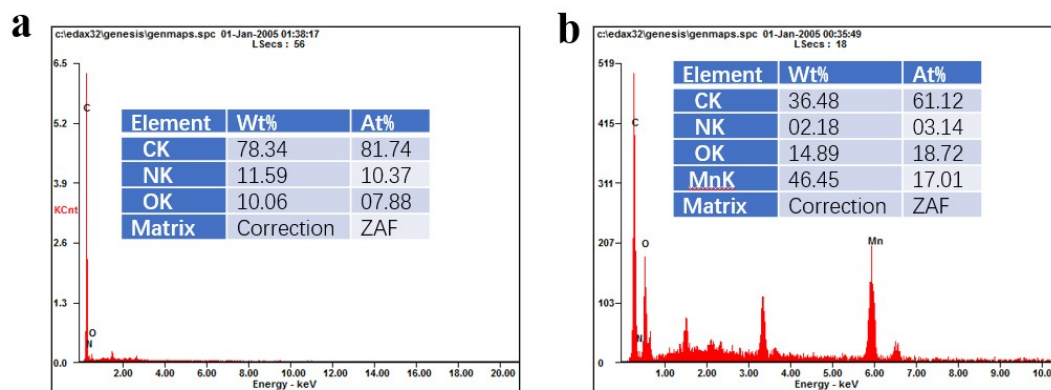

Figure S4. SEM-EDS of a) CCFs and b)  $\delta$ -MnO<sub>2</sub>@CCFs.

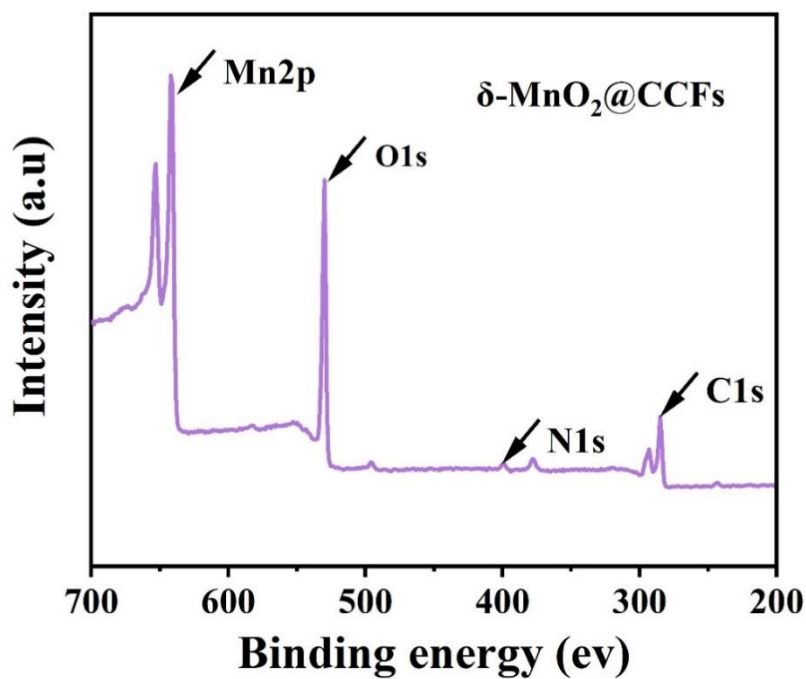

Figure S5. XPS survey spectra of  $\delta$ -MnO<sub>2</sub>@CCFs.

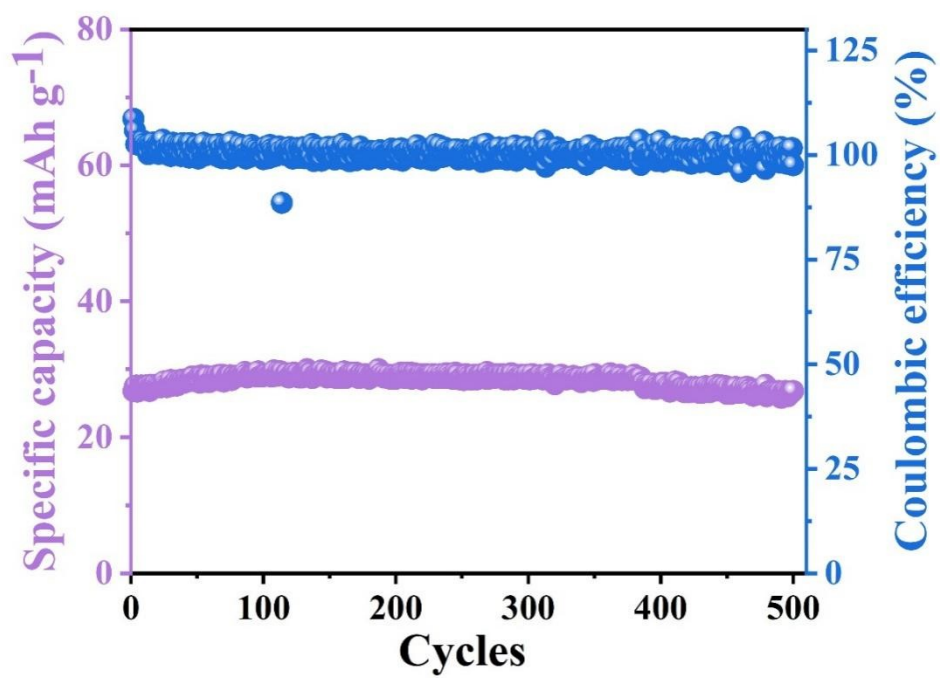

Figure S6. Cycling performance of CCFs at 1.0 A g<sup>-1</sup>.

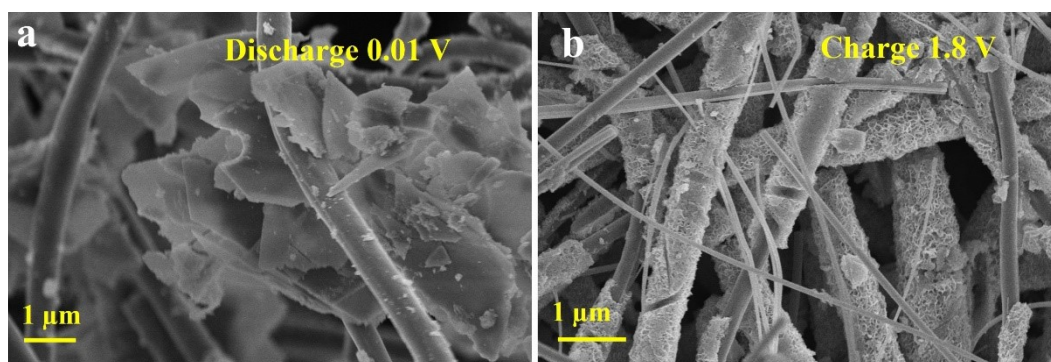

Figure S7. a) The SEM of discharge to 0.01 V and b) charge to 1.80 V of  $\delta$ -MnO<sub>2</sub>@CCFs.

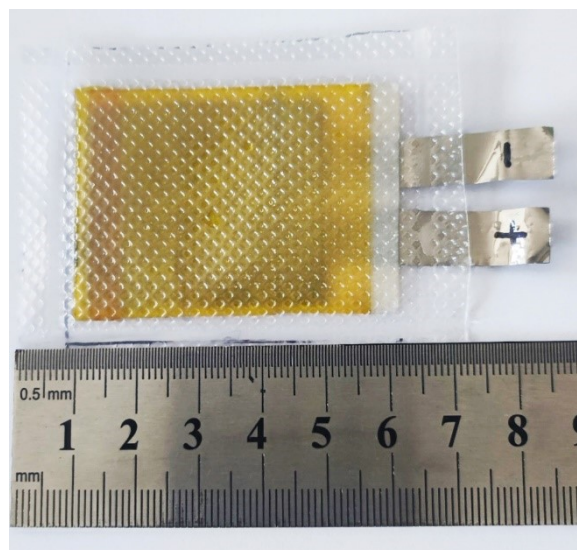

Figure S8 The photograph of a 3 cm × 5 cm flexible soft-packaged batteries.

Table S1 Comparison of electrochemical performance of  $\delta$ -MnO<sub>2</sub>@CCFs and reported MnO<sub>2</sub> electrode for ZIBs

| Materials                           | Current density (A g <sup>-1</sup> ) | Capacity (mAh g <sup>-1</sup> )    |
|-------------------------------------|--------------------------------------|------------------------------------|
| $\delta$ -MnO <sub>2</sub> @CCFs    | 0.5                                  | 352 at 100th cycle (this work)     |
|                                     | 3                                    | 132.3 at 7000th cycle (this work)  |
| S-MnO <sub>2</sub>                  | 1                                    | 122.9 at 1000th cycle <sup>1</sup> |
| MG10                                | 1                                    | 80 at 1000th cycle <sup>2</sup>    |
| CN <sub>600</sub> /MnO <sub>2</sub> | 0.1                                  | 249 at 60th cycle <sup>3</sup>     |
| MnO <sub>2</sub> nanospheres        | 0.3                                  | 358 at 100th cycle <sup>4</sup>    |
| MnO <sub>2</sub> -NHCS              | 2                                    | 100 at 2000th cycle <sup>5</sup>   |
| MnO <sub>2</sub> @PEDOT             | 2                                    | 213 at 2000th cycle <sup>6</sup>   |
| MGS                                 | 3                                    | 145 at 3000th cycle <sup>7</sup>   |
| S-MnO <sub>2</sub>                  | 0.2                                  | 320 at 100th cycle <sup>8</sup>    |
| MnO <sub>2</sub> @NC                | 2                                    | 90 at 2500th cycle <sup>9</sup>    |

## References

- (1) Xu, S.; Wang, F.; Diao, Q.; Zhang, Y., Li, G., Exploring the Mechanism of Single-Crystal MnO<sub>2</sub> as Cathodes for Zinc Ion Batteries. *ChemPlusChem* **2023**, (88), e202300341.
- (2) Cao, J.; Zhang, D.; Zhang, X.; Wang, S.; Han, J.; Zhao, Y.; Huang, Y., Qin, J., Mechanochemical Reactions of MnO<sub>2</sub> and Graphite Nanosheets as a Durable Zinc Ion Battery Cathode. *Appl. Surf. Sci.* **2020**, (534), 147630.
- (3) Ni, Z.; Zhao, L.; Zhao, H.; Jin, C.; Ge, B., Li, W., In-Situ Growth of MnO<sub>2</sub> Nanorods on CN Generates a Heterostructure with the Stability for Zinc Ion Battery. *J. Alloys Compd.* **2023**, (967), 171834.
- (4) Wang, J.; Wang, J.-G.; Liu, H.; Wei, C., Kang, F.J.J.o.M.C.A., Zinc Ion Stabilized MnO<sub>2</sub> Nanospheres for High Capacity and Long Lifespan Aqueous Zinc-Ion Batteries. *J. Mater. Chem. A* **2019**, (7), 13727-13735.
- (5) Chen, L.; Yang, Z.; Cui, F.; Meng, J.; Jiang, Y.; Long, J., Zeng, X.J.M.C.F., Ultrathin MnO<sub>2</sub> Nanoflakes Grown on N-Doped Hollow Carbon Spheres for High-Performance Aqueous Zinc Ion Batteries. *Mater. Chem. Front.* **2020**, (4), 213-221.
- (6) Chen, H.; Guo, J.; Tan, S.; Zhang, X.; Sang, Z., Yang, D.a., Dual-Modification of Oxygen Vacancies and Pedot Coating on MnO<sub>2</sub> Nanowires for High-Performance Zinc Ion Battery. *Appl. Surf. Sci.* **2023**, (638), 158057.
- (7) Wu, B.; Zhang, G.; Yan, M.; Xiong, T.; He, P.; He, L.; Xu, X., Mai, L., Graphene Scroll-Coated  $\alpha$ -MnO<sub>2</sub> Nanowires as High-Performance Cathode Materials for Aqueous Zn-Ion Battery. *Small.* **2018**, (14), 1703850.
- (8) Zhao, Y.; Zhang, P.; Liang, J.; Xia, X.; Ren, L.; Song, L.; Liu, W., Sun, X., Uncovering Sulfur Doping Effect in MnO<sub>2</sub> Nanosheets as an Efficient Cathode for Aqueous Zinc Ion Battery. *Energy Storage Mater.* **2022**, (47), 424-433.
- (9) Li, X.; Zhou, Q.; Yang, Z.; Zhou, X.; Qiu, D.; Qiu, H.; Huang, X., Yu, Y., Unraveling the Role of Nitrogen-Doped Carbon Nanowires Incorporated with MnO<sub>2</sub> Nanosheets as High Performance Cathode for Zinc-Ion Batteries. *Energy Environ. Mater.* **2023**, (6), e12378.
